# Supplementary material for: Targeted Delivery of Mesenchymal Stem Cell-Derived Nanovesicles for Spinal Cord Injury Treatment
Source: MDPI journal article supplement (doi:10.3390/ijms21114185), 2020-06-11
Supplement: s1 [file s1]

## Supporting Information

### Targeted Delivery of Mesenchymal Stem Cell-Derived Nanovesicles for Spinal Cord Injury Treatment

*Ju-Ro Lee, Jaewon Kyung, Hemant Kumar, Sung Pil Kwon, Seuk Young Song, In-Bo Han\* and Byung-Soo Kim\**

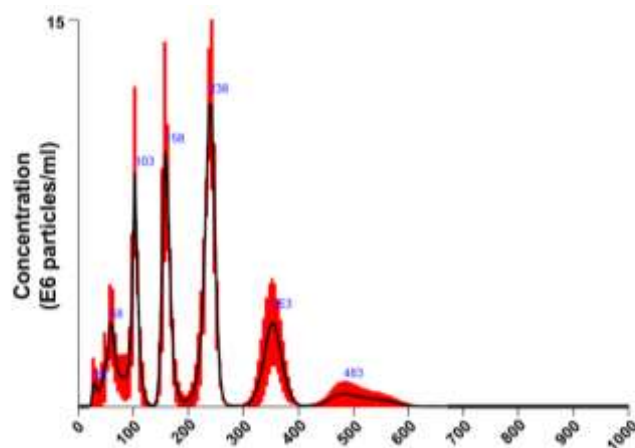

**Figure S1. Characterization of MΦ membrane.** Size distribution of MΦ membrane, as evaluated by nanoparticle tracking analysis.

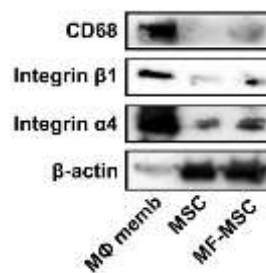

**Figure S2. Representative images of western blots of surface markers of macrophage membrane, MSC, and MF-MSC in Figure 2B** (n = 3 per samples, 20  $\mu$ g of total proteins).

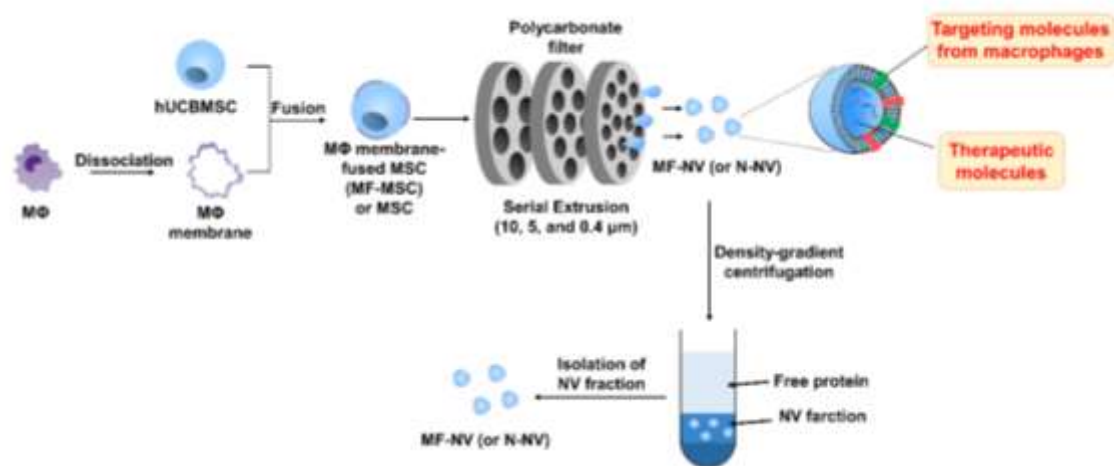

**Figure S3. Preparation of MF-NVs.** Schematic diagram of the preparation of MF-NVs.

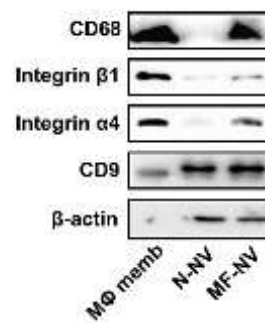

**Figure S4. Representative images of western blots of surface marker of macrophage membrane, N-NV, and MF-NV in Figure 2F** (n = 3 per samples, 20 μg of total proteins).

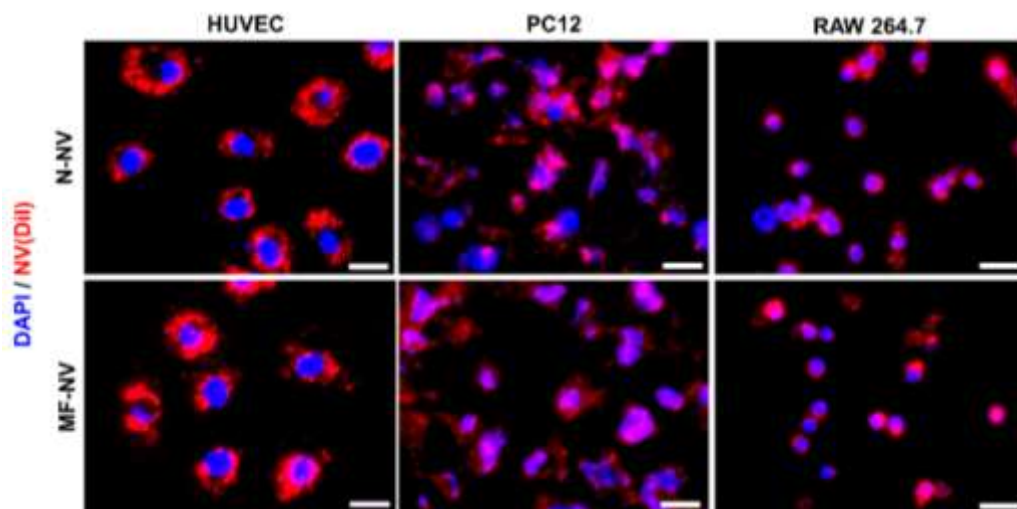

**Figure S5. Cellular uptake of NVs.** Representative images showing in vitro uptake of DiI-labeled N-NVs and MF-NVs by HUVECs, PC12 cells, and RAW 264.7 cells 24 hours after the treatment. Scale bars, 50 μm.

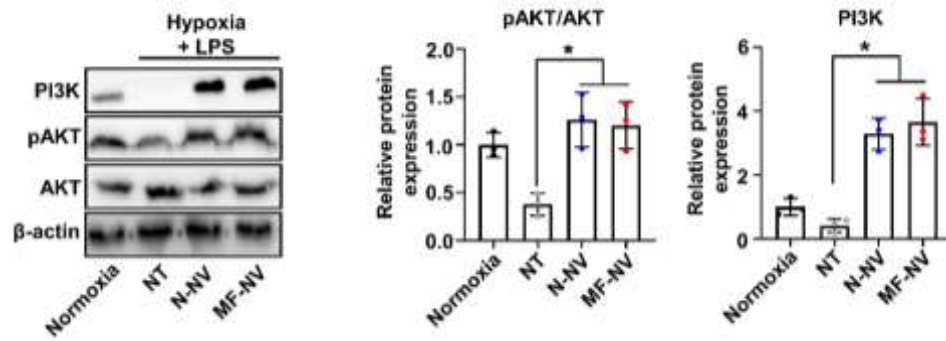

**Figure S6. Intracellular signaling cascades of PC12 cells after treatment.** Representative images and the quantification data of western blots of PC12 cells for AKT, pAKT, and PI3K after treatment. \* $p < 0.05$  by using one-way ANOVA followed by post-hoc Bonferroni test. All data were normalized to normoxia. All values are mean  $\pm$  SD. NT indicates no treatment.

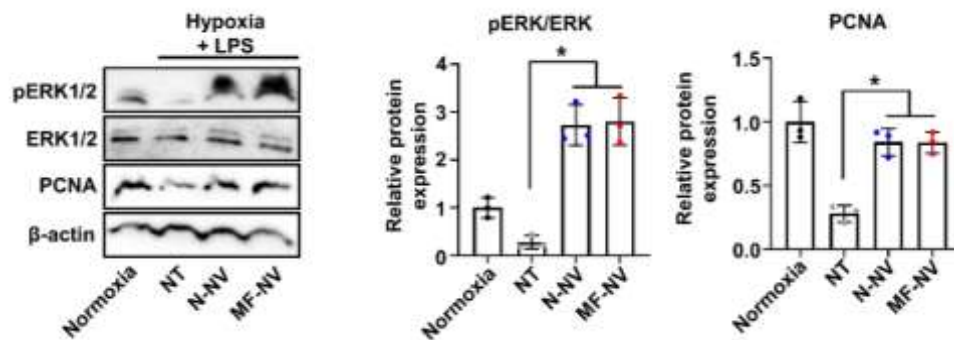

**Figure S7. Intracellular signaling cascades of HUVECs after treatment.** Representative images and the quantification data of western blots of HUVECs for PCNA, ERK 1/2, and pERK 1/2 after treatment. \* $p < 0.05$  by using one-way ANOVA followed by post-hoc Bonferroni test. All data were normalized to normoxia. All values are mean  $\pm$  SD. NT indicates no treatment.

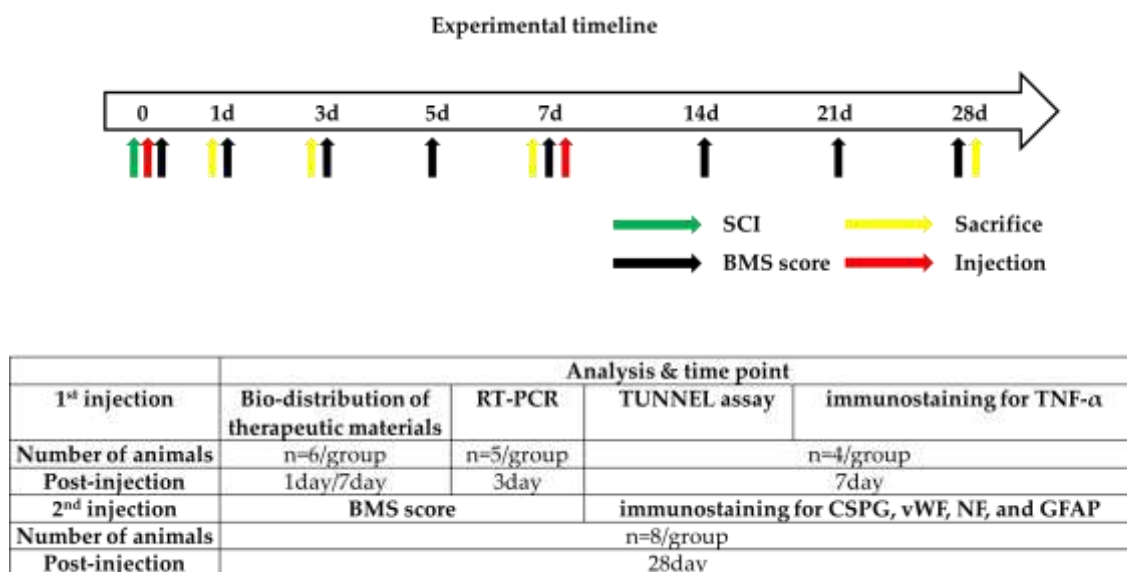

**Figure S8. In vivo Experimental Design and timeline.**

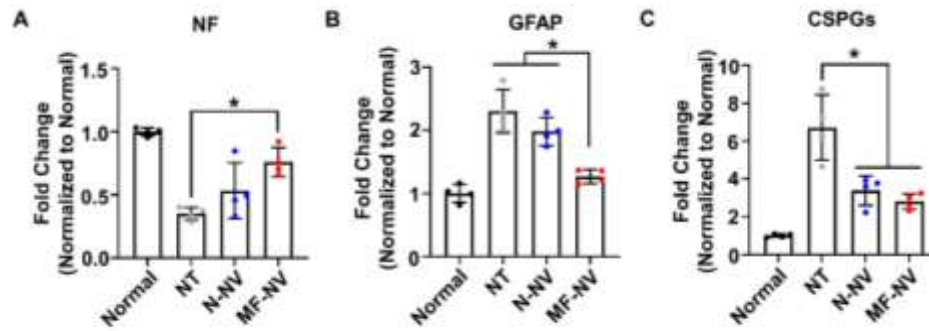

**Figure S9. The quantification data of IHC images in Figure 7.** IHC images of (A) NF, (B) GFAP, and (C) CSPGs were quantified, as evaluated by ImageJ software ( $n = 4$  animals per group). The data of fluorescent intensity per area were normalized to normal group. \* $p < 0.05$  by using one-way ANOVA followed by post-hoc Bonferroni test. All values are mean  $\pm$  SD. NT indicates no treatment.

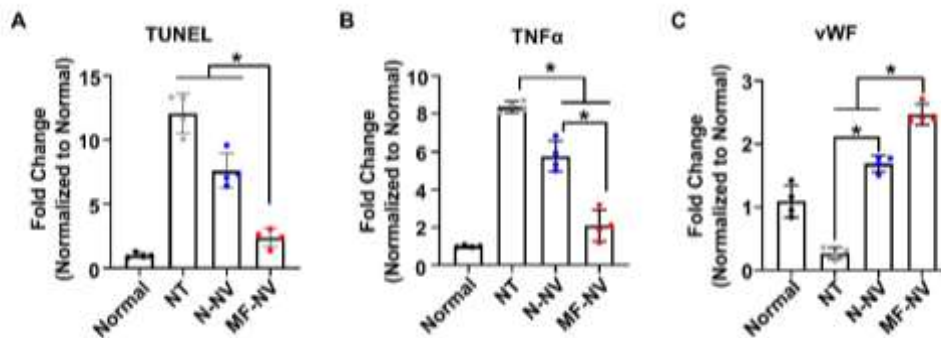

**Figure S10. The quantification data of IHC images in Figure 8.** IHC images of (A) TUNEL, (B) TNF $\alpha$ , and (C) vWF were quantified, as evaluated by ImageJ software ( $n = 4$  animals per group). The data of fluorescent intensity per area were normalized to normal group. \* $P < 0.05$  by using one-way ANOVA followed by post-hoc Bonferroni test. All values are mean  $\pm$  SD. NT indicates no treatment.

**Table S1. List of PCR primers of mouse-specific genes.** *Il1b*, interleukin 1 beta; *Il6* interleukin 6; *Nos2*, nitric oxide synthase 2; *Arg1*, arginase 1; *Il10*, interleukin 10; *Tnfa*, tumor necrosis factor alpha; *Vegf*, vascular endothelial growth factor.

| Gene         | Primers                 |                           |
|--------------|-------------------------|---------------------------|
|              | Forward (5'-3')         | Reverse (5'-3')           |
| <i>Gapdh</i> | GCATCTTCTTGTGCAGTGCC    | GGTAACCAGGCGTCCGATAC      |
| <i>Il1b</i>  | ATCAGGACAGCCCAGGTCAA    | GCCACCTTTTGACAGTGATGAG    |
| <i>Il6</i>   | GAGGATACCACTCCCAACAGACC | AAGTGCATCATCGTTGTTTCATACA |
| <i>Nos2</i>  | TCACCTTCGAGGGCAGCCGA    | TCCGTGGCAAAGCGAGCCAG      |
| <i>Arg1</i>  | GATTATCGGAGCGCCTTTCT    | CCACACTGACTCTTCCATTCTT    |
| <i>Cd206</i> | CTGCAGATGGGTGGGTATT     | GGCATTGATGCTGCTGTTATG     |
| <i>Il10</i>  | ACTGGCATGAGGATCAGCAG    | CTCCTTGATTCTGGGCCAT       |
| <i>Tnfa</i>  | ACCCTCACACTCACAAACCA    | GCAGCCTTGTCCTTGAAGA       |
| <i>Vegf</i>  | CAGGCTGCTCTAACGATGAA    | CAGGAATCCCAGAAACAACC      |

**Table S2. List of PCR primers of rat-specific genes.**

| Gene         | Primers              |                       |
|--------------|----------------------|-----------------------|
|              | Forward (5'-3')      | Reverse (5'-3')       |
| <i>Gapdh</i> | GCATCTTCTTGTGCAGTGCC | GGTAACCAGGCGTCCGATAC  |
| <i>Bax</i>   | ATGAATGGGGAACGGGGAAA | GAGGTTTATTGGCACCTCCCC |
| <i>Bcl2</i>  | CTGGTGGACAACATCGCTCT | CATCCCAGCCTCCGTTATCC  |

**Supplementary video 1.** Representative video of animals in the no treatment group 28 days post-injury.

**Supplementary video 2.** Representative video of animals in the N-NV group 28 days post-injury.

**Supplementary video 3.** Representative video of animals in the MF-NV group 28 days post-injury.
