# Supplementary material for: Targeted Delivery of Mesenchymal Stem Cell-Derived Nanovesicles for Spinal Cord Injury Treatment
Source: Int J Mol Sci. 2020 Jun 11;21(11):4185. doi: 10.3390/ijms21114185 (PMC7312698; doi:10.3390/ijms21114185)
Supplement: Supplementary file 1 [file ijms-21-04185-s001.zip]

Archive with 4 entries (4 files):
- Supplementary video 3.mp4
- Supplementary video 1.mp4
- Supplementary video 2.mp4
- ijms-818756-supplementary.pdf
